1 **Sox2 and canonical Wnt signaling interact to activate a developmental checkpoint**  
2 **coordinating morphogenesis with mesodermal fate acquisition**

3  
4 Brian A. Kinney<sup>1</sup>, Richard H. Row<sup>1</sup>, Yu-Jung Tseng<sup>1</sup>, Maxwell D. Weidmann<sup>2</sup>, Holger Knaut<sup>2</sup>,  
5 Benjamin L. Martin<sup>1\*</sup>

6  
7 1 Department of Biochemistry and Cell Biology, Stony Brook University, Stony Brook, NY 11794-  
8 5215

9  
10 2 Skirball Institute of Biomolecular Medicine, New York University School of Medicine, 540 First  
11 Avenue, New York, NY 10016

12  
13 \*Correspondence: benjamin.martin@stonybrook.edu

14  
15 **Abstract**

16  
17 Animal embryogenesis requires a precise coordination between morphogenesis and cell fate  
18 specification. It is unclear if there are mechanisms that prevent uncoupling of these processes  
19 to ensure robust development. During mesoderm induction, mesodermal fate acquisition is  
20 tightly coordinated with the morphogenetic process of epithelial to mesenchymal transition  
21 (EMT). In zebrafish, cells exist transiently in a partial EMT state during mesoderm induction.  
22 Here we show that cells expressing the neural inducing transcription factor Sox2 are held in the  
23 partial EMT state, stopping them from completing the EMT and joining the mesodermal  
24 territory. This is critical for preventing ectopic neural tissue from forming. The mechanism  
25 involves specific interactions between Sox2 and the mesoderm inducing canonical Wnt  
26 signaling pathway. When Wnt signaling is inhibited in Sox2 expressing cells trapped in the  
27 partial EMT, cells are now able to exit into the mesodermal territory, but form an ectopic spinal  
28 cord instead of mesoderm. Our work identifies a critical developmental checkpoint that ensures  
29 that morphogenetic movements establishing the mesodermal germ layer are accompanied by  
30 robust mesodermal cell fate acquisition.

31  
32  
33  
34  
35  
36  
37  
38  
39  
40  
41  
42  
43

## 44 Introduction

45

46 Epithelial to mesenchymal transition (EMT) is the process in which epithelial cells lose their  
47 adhesion to neighboring cells and adopt a mesenchymal migratory phenotype. This process was  
48 first described by observing chick mesoderm formation (Hay 1995), and was later found to  
49 occur in many other normal processes, as well as disease states such as cancer metastasis  
50 (Nakaya and Sheng 2013; Nieto 2013). More recently, metastable partial (also referred to as  
51 intermediate) EMT states have been observed, where cells maintain a transitional state that  
52 shares characteristics of both epithelial and mesenchymal cells (Ye and Weinberg 2015; Li and  
53 Kang 2016; Nieto et al. 2016). Partial EMT states are thought to be particularly important in the  
54 process of solid tumor metastasis, where metastable partial EMT states exhibit increased  
55 migratory and invasive capacity, as well as more stem-cell like characters (Campbell 2018; Aiello  
56 and Kang 2019). Despite this, it is unclear what purpose, if any, metastable partial EMT states  
57 play during normal development.

58

59 Vertebrate embryos contain neuromesodermal progenitors (NMPs) (Kimelman 2016; Martin  
60 2016), which make a binary decision to become spinal cord cells, or mesoderm that will  
61 primarily form the somites (Tzouanacou et al. 2009; Martin and Kimelman 2012). During  
62 mesoderm induction, NMPs undergo an EMT, which is tightly associated with the acquisition of  
63 mesodermal fate (Goto et al. 2017). This occurs in a two-step process, where Wnt signaling  
64 initiates the EMT, and FGF signaling promotes EMT completion by activating the expression of  
65 the transcription factors *tbx16* and *msgn1* (Goto et al. 2017). Zebrafish embryos deficient in the

66 t-box transcription factor *tbx16* (originally called *spadetail*) have a large accumulation of cells at  
67 the posterior-most structure of the embryo called the tailbud (Kimmel et al. 1989; Griffin et al.  
68 1998), a phenotype caused by the inability of the NMPs to complete their EMT and join the  
69 developing paraxial mesoderm (Row et al. 2011; Manning and Kimelman 2015). This phenotype  
70 is very similar to mouse embryos lacking function of the related t-box transcription factor *Tbx6*,  
71 which also have an enlarged tailbud and deficit in paraxial mesoderm (Chapman and  
72 Papaioannou 1998). Cells in the partial EMT state exhibit increased adhesiveness compared to  
73 the fully mesenchymal state, and cells lacking *tbx16* maintain a metastable partial EMT state  
74 until *tbx16* is activated, after which they complete the EMT (Row et al. 2011).

75  
76 NMPs are characterized by co-expression of the two transcription factors, *sox2*, which  
77 promotes spinal cord fate, and *brachyury* (*tbxta* and *tbxtb* in zebrafish), which specifies  
78 mesoderm in part through activation of canonical Wnt signaling (Martin and Kimelman 2008;  
79 Martin and Kimelman 2010; Takemoto et al. 2011; Martin and Kimelman 2012; Bouldin et al.  
80 2015). Here we show that the critical role of *Tbx16* is to repress *sox2* transcription in the partial  
81 EMT state as cells become mesoderm. *Sox2* activation alone is sufficient to recapitulate the  
82 *Tbx16* loss of function phenotype, where cells are prevented from exiting the tailbud and  
83 remain trapped in an undifferentiated partial EMT state. This acts as a developmental  
84 checkpoint, since cells with *sox2* expression in mesodermal territories outside of the tailbud will  
85 become neurons. Thus, the checkpoint ensures coordination of morphogenesis with proper cell  
86 fate acquisition to prevent ectopic neural formation. Our work for the first time demonstrates  
87 an essential normal function of partial EMT states during development, and provides insight

88 into how the partial EMT state in cancer can be targeted by inhibiting developmental  
89 checkpoints.

90

## 91 **Results**

92

### 93 **Sox2 activation is sufficient to induce neural differentiation in a context dependent manner**

94

95 NMPs express the neural inducing transcription factor *sox2*, which is down-regulated as NMPs  
96 become mesoderm (Delfino-Machin et al. 2005; Takemoto et al. 2011; Martin and Kimelman  
97 2012; Bouldin et al. 2015). To determine the role that Sox2 plays in NMPs, we used a heat-  
98 shock inducible *sox2* transgenic line (*HS:sox2*) (Row et al. 2016). When *sox2* was activated  
99 throughout the embryo at the end of gastrulation (bud stage) and analyzed at 24 hours post  
100 fertilization (hpf), ectopic expression of the neural marker *neurog1* was observed in  
101 mesodermal territories (Fig. 1A, B), and there was a corresponding decrease in the skeletal  
102 muscle marker *myod* (Fig. 1C, D). Activation of *sox2* at bud stage in the background of reporter  
103 transgenes for skeletal muscle (*actc1b:gfp*) (Higashijima et al. 1997) and neurons  
104 (*neurog1:mkate2*) resulted in a loss of differentiated muscle and the presence of ectopic  
105 neurons in mesodermal territories (Fig. 1E, F). To test whether the effect of Sox2 is cell  
106 autonomous, we transplanted cells transgenic for *HS:sox2* and *neurog1:mkate2* (Fig. 1G-H') or  
107 *HS:sox2* and *actc1b:gfp* (Fig. 1I-J') into the ventral margin of shield stage wild-type embryos.  
108 The activation of *sox2* by heat shock in transplanted cells caused a significant cell-autonomous  
109 induction of more neural cells, including in ectopic locations, at the expense of skeletal muscle

110 cells (Fig. 1G-L, for *neurog1:mkate2* quantification 1,177 wild-type donor cells were counted in  
111 8 host embryos, and 2,051 *HS:sox2* donor cells were counted from 10 host embryos, statistics  
112 were performed using an unpaired t test,  $P=0.0105$ , for *actc1b:gfp* quantification 1,307 wild-  
113 type donor cells were counted in 8 host embryos, and 971 *HS:sox2* donor cells were counted  
114 from 5 host embryos, statistics were performed using an unpaired t test  $***P=0.0003$ ).

115 Intriguingly though, the induction of ectopic neural fate by *sox2* in both the whole embryo and  
116 transplant conditions was localized to more anterior regions of the embryo. Additionally, while  
117 72.54% of control transplanted cells differentiated into either muscle or neurons, only 42% of  
118 *sox2*-expressing cells differentiated into these cell types (Fig. 1K, L). Upon further examination,  
119 a large proportion of *sox2*-expressing cells gave rise to fin mesenchyme, a phenotype that is  
120 also observed in transplanted *tbx16* mutant cells, which are trapped in the partial EMT state  
121 (Fig. 1M-P, 2,129 wild-type donor cells were counted in 6 host embryos, 2,714 *tbx6*  $-/-$  donor  
122 cells were counted in 6 host embryos ( $***P=0.0006$ ), and 2,347 *HS:sox2* donor cells were  
123 counted from 9 host embryos ( $*P=0.0322$ )) (Ho and Kane 1990; Row et al. 2011).

124

### 125 **Sustained *sox2* expression in mesoderm fated NMPs traps them in a partial EMT state**

126

127 *Tbx16* is necessary and sufficient for *sox2* repression (Bouldin et al. 2015), and *tbx16* loss-of-  
128 function and *sox2* gain-of-function both bias transplanted cells located in the tailbud of host  
129 embryos towards a fin mesenchyme fate (Fig. 1M-P). We hypothesize based on these  
130 observations that maintenance of *sox2* expression in *tbx16* mutant cells is responsible for the  
131 cell migration defect that prevents cells from exiting the tailbud. We transplanted *HS:sox2* cells

132 into the ventral margin of wild-type host embryos. Activation of *sox2* expression at bud and 12-  
133 somite stages prevented transplanted cells from exiting the tailbud into the mesodermal  
134 territory and the majority of cells are found at the posterior end of the host embryo (Fig 2A-C).  
135 To better understand the migratory dynamics of the *sox2* expressing cells in the tailbud, we  
136 labeled embryos with a nuclear localized *kikume* (*NLS-kikRG*), which can be photoconverted  
137 from green to red, by injecting in vitro transcribed mRNA. Small groups of cells in the NMP  
138 region were photoconverted and time-lapse imaged for 300 minutes. Wild-type cells move  
139 ventrally in a directed fashion (Fig. 2D-E, H-J). While *sox2* expressing cells move faster than  
140 wild-type cells, their overall displacement is reduced, due to significantly reduced migratory  
141 track straightness (Fig. 2F-J, F, 281 cells were tracked in 5 embryos, G, 200 cells were tracked in  
142 3 embryos, statistics were performed using an unpaired t test \*\*\*P<0.0001). The migratory  
143 activity but lack of directed migration defines the partial EMT state during zebrafish mesoderm  
144 induction (Manning and Kimelman 2015), suggesting that *sox2* expressing cells are trapped in a  
145 partial EMT. To further confirm this, transgenic *HS:CAAX-mCherry-2A-NLS-KikGR* cells, or  
146 *HS:CAAX-mCherry-2A-NLS-KikGR x HS:sox2* cells, were transplanted into the ventral margin of  
147 wild-type host embryos. Sox2 expressing cells emigrated from the posterior wall of the tailbud  
148 and completed the first EMT step, but remained in the partial EMT state with dynamic  
149 membrane protrusions lacking polarization (Figure S1).

150           Since *sox2* must be repressed for NMPs to complete EMT and become fully  
151 mesenchymal, loss of *sox2* function may impact the normal rate at which cells exit the tailbud  
152 and join the paraxial mesoderm. To determine whether *sox2* function impacts the normal  
153 formation of somites from NMPs, we analyzed somite development in a *sox2* mutants (Gou et

154 al. 2018a; Gou et al. 2018b). Somites were visualized with a muscle specific antibody (MF20,  
155 anti-myosin heavy chain), which indicated that the posterior somites appeared smaller (Fig. 2K-  
156 N). Total nuclei counts in somites 25-28 revealed that posterior somites contain significantly  
157 fewer cells than wild-type siblings (Fig. 2O-S, for panel S \*P=0.0145). Our results are consistent  
158 with the hypothesis that loss of *sox2* function allows NMPs to exit into the paraxial mesoderm  
159 prematurely, leaving fewer cells to contribute to the posterior-most somites. Although we saw  
160 an increase in nuclei in more anterior somites of *sox2* mutants, these results were not  
161 statistically significant, indicating that there may be additional controls regulating somite cell  
162 number if a larger number of cells initially join a somite than normal (Fig. 2 Q P=0.4721, R  
163 P=0.3208).

164

#### 165 ***sox2* loss of function rescues *tbx16* loss of function**

166

167 Sox2 gain-of function or *tbx16* loss of function in mesoderm fated NMPs causes them to be  
168 trapped in a partial EMT state, and Tbx16 normally acts to repress *sox2* expression (Bouldin et  
169 al. 2015). To determine if *sox2* is a critical target of Tbx16 accounting for the *tbx16* mutant  
170 phenotype, we performed *tbx16* loss of function rescue experiments using a *sox2* loss of  
171 function mutant. The *sox2* mutation is able to rescue *tbx16* morphant muscle formation in both  
172 whole embryo (Fig. 3A-D') and transplant conditions (Fig. 3E-G, 1,030 *tbx16* morphant donor  
173 cells were counted from 7 host embryos, and 609 *sox2* <sup>-/-</sup> *tbx16* morphant donor cells were  
174 counted from 4 host embryos, statistics were performed using an unpaired t test \*P=0.0082),  
175 where *tbx16* morpholinos were injected into embryos from a *sox2*<sup>+/-</sup> in-cross, and cells from

176 these embryos were transplanted into wild-type host embryos. Additionally, we performed cell  
177 tracking experiments in *tbx16* MO, *sox2*<sup>-/-</sup> and *tbx16* MO; *sox2*<sup>-/-</sup> embryos (Fig. 3H-O). Cells  
178 lacking *tbx16* behave similarly to cells with a gain of *sox2* function, including decreased track  
179 straightness and overall displacement, with an increase in track speed relative to wild-type cells  
180 (Fig. 3P-R). Cells lacking both *tbx16* and *sox2* function regain wild-type like behavior, including a  
181 significant rescue of displacement, track speed, and track straightness (Fig. 3P-R, 281 wild-type  
182 cells were tracked from 5 embryos, 183 *tbx16* morphant cells were tracked from 3 embryos,  
183 210 *sox2*<sup>-/-</sup> cells were tracked from 3 embryos, and 218 *sox2*<sup>-/-</sup> *tbx16* morphant cells were  
184 tracked from 3 embryos, statistics were performed using an unpaired t test \*\*P=0.0029,  
185 \*\*\*P<0.0001). Taken together, these results indicate that *sox2* is a critical target gene  
186 repressed by Tbx16. In the absence of *tbx16*, increased levels of *sox2* cause cells to become  
187 trapped in a partial EMT state and prevent their exit into the mesodermal territory.

188

189 **Checkpoint activation occurs through a synergistic interaction of Sox2 and canonical Wnt**  
190 **signaling**

191

192 The expression of *sox2* prevents mesoderm fated NMPs from exiting the tailbud into the  
193 mesodermal territory. However, *sox2* expression does not prevent exit of NMPs from the  
194 tailbud into the spinal cord territory, suggesting that there is local difference in the niche  
195 context of the tailbud that accounts for this differential activity of Sox2. We previously showed  
196 that in the absence of canonical Wnt signaling, NMPs sustain *sox2* expression and join the  
197 spinal cord and not the mesoderm, whereas the activation of Wnt signaling using a



198 constitutively active *β-catenin* transgene causes NMPs to join the mesoderm and not the spinal  
199 cord (Martin and Kimelman 2012). These results suggest that the presence or absence of the  
200 canonical Wnt signaling pathway accounts for the context dependent activity of *sox2*. To test  
201 this model, we performed transplant experiments with *tbx16* morphant cells or *HS:sox2*  
202 transgenic cells in the presence or absence of the *HS:TCFΔC* transgene, which cell-  
203 autonomously inhibits canonical Wnt signaling (Martin and Kimelman 2012). Transplanted wild-  
204 type cells contribute to various tissues throughout the body (Fig. 4A, N=16)). Cells lacking *tbx16*  
205 fail to join the paraxial mesoderm and instead contribute predominantly to fin mesenchyme, as  
206 previously reported (Fig. 4D-D'', N=35) (Ho and Kane 1990; Row et al. 2011). When *sox2* or  
207 *TCFΔC* expression are activated in transplanted cells at bud stage, fewer cells contribute to the  
208 paraxial mesoderm (Fig. 4B, C, for B N=18, for C N=4). When Wnt signaling is inhibited in *tbx16*  
209 morphant cells, cells can now enter into the paraxial mesodermal territory, but rather than give  
210 rise to mesoderm, they form an ectopic spinal cord (Fig. 4E-E'', N=43, 35 with ectopic spinal  
211 cords). The ectopic spinal cords have the proper anatomical structure of a neural canal with  
212 motile cilia projecting into the canal (Supplemental movies 1-3), as well as differentiated  
213 neurons sending axonal projections through the ectopic spinal cord (Fig. 4G-H'). To determine  
214 whether this phenotype is due to sustained *sox2* expression in *tbx16* morphant cells, we  
215 performed transplants with cells with both the *HS:sox2* and *HS:TCFΔC* transgenes. Combined  
216 heat-shock activation of *sox2* and inhibition of Wnt signaling causes the same, yet more severe  
217 phenotype of an ectopic spinal cord in the mesodermal territory along the body axis (Fig. 4F-F'',  
218 N=17, all with ectopic spinal cords). The synergistic neural inducing activity of *sox2* activation  
219 and canonical Wnt signaling inhibition is also observed in whole embryos, where combined

220 *sox2* activation and Wnt inhibition induces spinal cord broadly throughout the normal paraxial  
221 mesoderm domain (Fig. S2). These results show that the checkpoint holding *sox2* expressing  
222 cells in the partial EMT state is activated by the combined presence of *sox2* and canonical Wnt  
223 signaling, and that the checkpoint can be bypassed by eliminating Wnt signaling in *sox2*  
224 expressing cells, which allows them to exit the tailbud to form an ectopic spinal cord (Fig. 4I).

225

## 226 **Discussion**

227

228         The mesodermal EMT during development is associated with progression towards  
229 differentiation, whereas cancer EMTs are generally thought to lead to increased stem cell  
230 characteristics and a lack of differentiation. Recent evidence suggests that metastasizing cancer  
231 cells are predominantly in a partial EMT state, and that the partial state is more stem-cell like  
232 than the fully mesenchymal state (Campbell 2018; Aiello and Kang 2019). Here we show that  
233 the partial EMT state during mesoderm induction is a developmental checkpoint that prevents  
234 differentiation into either neural or mesodermal fates. In addition to preventing differentiation,  
235 activation of the checkpoint alters the normal migratory properties of these cells. Thus, the  
236 initiation of metastasis in solid tumors through a partial EMT may be recapitulating a  
237 developmental state in which cells with aberrant gene expression patterns are activating a  
238 developmental checkpoint. Importantly, our results show that the initiation of the EMT leading  
239 to the partial EMT state is uncoupled from mesodermal fate, and is fully reversible back to the  
240 epithelial state and eventual neural differentiation by withdrawing the checkpoint activating

241 Wnt signal. The uncoupling of EMT initiation and mesodermal fate acquisition underscores the  
242 importance of having a developmental checkpoint

243       Loss of *tbx16* function in zebrafish activates the developmental checkpoint because cells  
244 maintain *sox2* expression in a high canonical Wnt signaling environment. While a partial EMT  
245 state during mouse mesoderm induction has not been described, the same checkpoint is likely  
246 to function in mouse embryos, as loss of function of the closely related t-box transcription  
247 factor *Tbx6* causes a large accumulation of cells in the tailbud that are unable to exit into the  
248 mesodermal territory (Chapman and Papaioannou 1998). In this context, *sox2* also fails to be  
249 repressed and is maintained in a high Wnt environment (Takemoto et al. 2011). One key  
250 difference of the mouse *Tbx6* mutant compared to the zebrafish *tbx16* mutant is that in the  
251 mouse a subset of cells exit the tailbud to form ectopic spinal cords where somites should  
252 normally form (Chapman and Papaioannou 1998). Ectopic neural tissue is never observed in the  
253 zebrafish *tbx16* mutant, or in the *tbx16/msgn1* or *tbx16/tbx6l* double mutants, which have a  
254 more severe phenotype than the *tbx16* single mutant (Fior et al. 2012; Yabe and Takada 2012;  
255 Morrow et al. 2017). Since lowering Wnt signaling in *tbx16* mutant cells allows them to exit the  
256 tailbud and form an ectopic spinal cord, the relative level of canonical Wnt signaling inducing  
257 mesoderm in the tailbud of zebrafish is likely to be higher than in mouse. Canonical Wnt  
258 signaling promotes an accelerated exit of mesoderm from the tailbud (Martin and Kimelman  
259 2012; Bouldin et al. 2015), and differences in Wnt signaling levels may explain the rapid exit and  
260 differentiation of mesoderm from the tailbud of zebrafish, which occurs over the course of just  
261 12 hours, compared to the relatively slow exit from the mouse tailbud, which is drawn out over  
262 several days. Thus, modulation of Wnt signaling levels may be a key evolutionary adaptation

263 affecting vertebrate body axis formation through changes in NMP dynamics, and the relative  
264 difference in Wnt levels may explain the species specific differences between NMP  
265 development (Martin and Kimelman 2009; Steventon et al. 2016; Attardi et al. 2018; Mallo  
266 2019), as well as phenotypic differences of the *Tbx6* mouse mutant and the *tbx16* single or  
267 *tbx16/tbx6l* and *tbx16/msgn1* double zebrafish mutants (Chapman and Papaioannou 1998; Fior  
268 et al. 2012; Yabe and Takada 2012; Morrow et al. 2017).

269         The developmental checkpoint preventing *sox2* positive cells from exiting into the  
270 mesodermal territory is activated by canonical Wnt signaling, and together these factors both  
271 prevent differentiation and delay morphogenesis of mesoderm fated NMPs. This is in stark  
272 contrast to the roles of these factors in the absence of the other, where each promotes  
273 differentiation along the neural (*sox2*) or mesodermal (Wnt) lineages (Takemoto et al. 2011;  
274 Martin and Kimelman 2012; Gouti et al. 2014; Garriock et al. 2015; Row et al. 2016; Gouti et al.  
275 2017; Koch et al. 2017). This type of interaction where two lineage promoting factors can  
276 together prevent the differentiation down either lineage is a well-known feature of  
277 hematopoietic stem cells (Cross and Enver 1997; Nimmo et al. 2015). These cells are said to be  
278 in a lineage primed state, where they are held in an undifferentiated state but are poised to  
279 rapidly differentiate into either lineage as soon as one factor becomes enriched relative to the  
280 other. Our work shows that NMPs, which express *sox2* and have canonical Wnt signaling  
281 activity, are similarly in a poised state, ready to rapidly differentiate into either neural tissue or  
282 mesoderm when Wnt signaling or *sox2* expression is repressed. These results help explain the  
283 dual paradoxical functions of Wnt signaling during NMP maintenance and differentiation. While  
284 Wnt signaling is required for mesoderm induction from NMPs, it is also required for the

285 maintenance, and possible expansion, of the undifferentiated NMP population (Takada et al.  
286 1994; Garriock et al. 2015; Wymeersch et al. 2016). How the combination of Sox2 and Wnt  
287 signaling promotes differential cell biology than either factor alone remains to be determined,  
288 but there are several instances reported of Sox transcription factors binding to  $\beta$ -catenin, which  
289 in some cases can affect a unique transcriptional program (Kormish et al. 2010; Ye et al. 2014).  
290 Our results suggest the difference in Wnt function may be due to whether  $\beta$ -catenin is  
291 interacting predominantly with Sox2 to promote NMP maintenance, or Lef1/TCF family proteins  
292 to promote mesodermal differentiation.

293

## 294 **Methods**

295

### 296 **Fish Care and Lines**

297 All zebrafish methods were approved by the Stony Brook University Institutional Animal  
298 Care and Use Committee. Transgenic and mutant lines used include *hsp70l:sox2-2A-NLS-*  
299 *KikGR<sup>sbu100</sup>* (referred to here as *HS:sox2*) (Row et al. 2016), *HS:CAAX-mCherry-2A-NLS-KikGR<sup>sbu104</sup>*  
300 (Goto et al. 2017), *sox2-2A-sfGFP<sup>stl84</sup>* (Shin et al. 2014), *actc1b:gfp<sup>zf13</sup>* (Higashijima et al. 1997),  
301 *neurog1:mKate2-CAAX* (this paper), *tbx16<sup>b104</sup>* (Kimmel et al. 1989), and *sox2<sup>x50</sup>* (Gou et al. 2018a;  
302 Gou et al. 2018b). Heat shock inductions were performed by immersing embryos in an elevated  
303 temperature water bath (37°C to 40°C) for 30 minutes.

304

### 305 **Generation of a zebrafish *neurogenin1* transgenic reporter line**

306 For the *neurog1:mKate2-CAAX* transgene, we cloned a genomic fragment spanning 8.4  
307 kb up-stream of the *neurog1* start codon (Blader et al. 2003) into the p5E plasmid (*p5E-*  
308 *neurog1*, Invitrogen, USA) and the coding sequence of the fluorescent protein mKate2 (Evrogen,  
309 Russia) followed in-frame by a CAAX box from HRAS into the pME plasmid (*pME-mKate2-CAAX*,  
310 Invitrogen, USA). Using gateway recombination (Invitrogen, USA), we fused the *neurog1*  
311 genomic fragment from the *p5E-neurog1* plasmid to *mKate2-CAAX* from *pME-mKate2-CAAX*  
312 plasmid followed by a *SV40pA* signal from the *p3E-polyA* plasmid into the *pDestTol2pA2*  
313 plasmid (Kwan et al. 2007). The resultant plasmid is called *pDest-neurog1:mKate2-CAAX-*  
314 *SV40pA*. For transgenesis, 25 ng/μl of the *pDest-neurog1:mKate2-CAAX-SV40pA* plasmid was  
315 co-injected with *in vitro* transcribed *tol2* transposase mRNA (Thermo Fisher, USA) into one-cell-  
316 stage embryos (Kawakami et al. 2000). Transgenic fish were identified by mKate2 fluorescence  
317 at 1 dpf using a Leica M165 fluorescent stereo microscope (Leica Microsystems Inc., Germany).  
318 The full name of this transgenic line is *Tg(-8.4neurog1:Kate2-CAAX)*.

319

## 320 **Imaging**

321 For tailbud exit transplantation experiments, cells were mounted in 2% methylcellulose  
322 with tricaine. Imaging was done on a Leica DMI6000B inverted microscope. For cell tracking,  
323 transplant quantification, and cell shape analysis, embryos were mounted in 1% low melt agarose  
324 with tricaine and imaged on a custom built spinning disk confocal microscope with a Zeiss Imager  
325 A.2 frame, a Borealis modified Yokogawa CSU-10 spinning disc, ASI 150uM piezo stage controlled  
326 by an MS2000, an ASI filter wheel, a Hamamatsu ImageEM x2 EMCCD camera (Hamamatsu  
327 C9100-23B), and a 63x 1.0NA water immersion lens. This microscope is controlled with

328 Metamorph microscope control software (V7.10.2.240 Molecular Devices), with laser  
329 illumination via a Vortran laser merge controlled by a custom Measurement Computing  
330 Microcontroller integrated by Nobska Imaging. Laser power levels were set in Vortran's Stradus  
331 VersaLase 8 software.

332

### 333 ***In Situ* Hybridization and Immunohistochemistry**

334 Whole-mount *in situ* hybridization was performed as previously described (Griffin et al.  
335 1995). For skeletal muscle antibody labeling, embryos were treated with a 1:50 dilution of the  
336 MF-20 antibody (Developmental Studies Hybridoma Bank – a myosin heavy chain antibody  
337 labeling skeletal and cardiac muscle) followed by an Alexa Fluor 561-conjugated anti-mouse  
338 secondary antibody. For somite quantification embryos were injected with 100pg *kikume* mRNA  
339 and fixed at 36 hpf and treated with MF-20 antibody. MF-20-labeled somites were imaged on a  
340 spinning disk confocal microscope using a 40x/1.0 dip objective in embryo media. Somitic nuclei  
341 were counted using spots on Imaris software (Bitplane, Oxford Instruments).

342

### 343 **Whole Embryo Reporter Expression**

344 Reporter lines for neural (*ngn:mKate2*) or muscle (*actc1b:gfp<sup>zf13</sup>*) were crossed to the HS:  
345 *hsp70l:sox2-2A-NLS-KikGR<sup>sbu100</sup>* and imaged live on a spinning disk confocal microscope using the  
346 10x/0.3 air objective at 36 hpf.

347

### 348 ***sox2* Overexpression Transplants**

349 Cell transplantation experiments were performed from sphere stage to shield stage  
350 targeting the ventral margin (Martin and Kimelman 2012). Transplanted embryos were heat  
351 shocked at 39°C for 30 minutes at bud and 12 somite stages. Embryos were imaged on the  
352 spinning disk confocal using the 10x/0.3 air objective at 36 hpf.

353

#### 354 ***sox2* Mutant and *sox2:sfGFP* Transplants**

355 Donor embryos were injected with 100 pg of *kikume* mRNA and a mix of two *tbx16*  
356 morpholinos (MO1: AGCCTGCATTATTTAGCCTTCTCTA (1.5ng) MO2:  
357 GATGTCCTCTAAAAGAAAATGTCAG (0.75ng)) as previously described (Lewis and Eisen 2004).  
358 Donor cells were transplanted from sphere stage donors to shield stage hosts targeted to the  
359 ventral margin as previously described (Martin and Kimelman 2012). Donor embryos were  
360 screened for the *sox2* genotype and presence of *actc1b:gfp<sup>zf13</sup>* reporter. Embryos were imaged  
361 on the spinning disk confocal using the 10x/0.3 air objective at 36 hpf.

362

#### 363 **Transplant Tissue Contribution Quantification**

364 For neural quantification embryos were imaged live on a spinning disk confocal  
365 microscope using the 10x/0.3 air objective. For muscle quantification transplanted cells were  
366 photoconverted on an inverted microscope using 405 nm light for 30 seconds and embryos were  
367 imaged live on a spinning disk confocal microscope using the 10x/0.3 air objective. Transplanted  
368 nuclei within reporter lines were quantified using Imaris (Bitplane, Oxford Instruments). When  
369 necessary, images were stitched using Fiji (Preibisch et al. 2009).

370



### 371 **Transplant Cell Exit Quantification**

372 Donor embryos were injected with 2% fluorescein dextran and cells were transplanted  
373 from sphere to shield stage targeting the ventral margin as described previously. Host embryos  
374 were imaged on an inverted Leica DMI6000B microscope using the 10x/0.4 dry objective.  
375 Compound fluorescence from transplanted cells was measured from anterior to posterior  
376 starting from somite 12 to the end of the tail using Fiji.

377

### 378 **Tailbud Cell Tracking**

379 Embryos were injected with 25 pg of *kikume* mRNA at the 1-cell stage. A small region  
380 containing NMPs was photoconverted on an inverted Leica DMI6000B microscope using 405 nm  
381 filter set for 30 seconds and tracked on a spinning disk confocal using the 20x/0.8 air objective  
382 and tracked on Imaris as previously described (Goto et al. 2017).

383

### 384 **Cell Shape Analysis**

385 Cells from *HS:CAAX-mCherry-2A-NLS-KikGR<sup>sbu104</sup>* donor embryos were transplanted to the  
386 ventral margin of unlabeled wild-type host embryos and imaged over 8 hours with 5 minute  
387 intervals on a spinning disk confocal microscope using the 40x/1.0 dip objective in embryo media  
388 and analyzed on Fiji and Imaris as previously described (Goto et al. 2017).

389

### 390 **Acknowledgments**

391

392 We thank David Matus for use of the spinning disc confocal microscope and comments on the  
393 manuscript, Taylor Kinney for advice, Neal Bhattacharji and Stephanie Flanagan for excellent  
394 zebrafish care, and Bruce Riley for providing sending the *sox2<sup>x50</sup>* mutant prior to publication. This  
395 work was supported NIH NINDS (R01NS102322) to HK, and by NSF (IOS 1452928) and NIH NIGMS  
396 (1R01GM124282) grants to BLM.

397

## 398 **References**

399

- 400 Aiello NM, Kang Y. 2019. Context-dependent EMT programs in cancer metastasis. *J Exp Med*  
401 **216**: 1016-1026.
- 402 Attardi A, Fulton T, Florescu M, Shah G, Muresan L, Lenz MO, Lancaster C, Huisken J, van  
403 Oudenaarden A, Steventon B. 2018. Neuromesodermal progenitors are a conserved  
404 source of spinal cord with divergent growth dynamics. *Development* **145**.
- 405 Blader P, Plessy C, Strahle U. 2003. Multiple regulatory elements with spatially and temporally  
406 distinct activities control neurogenin1 expression in primary neurons of the zebrafish  
407 embryo. *Mech Dev* **120**: 211-218.
- 408 Bouldin CM, Manning AJ, Peng YH, Farr GH, Hung KL, Dong A, Kimelman D. 2015. Wnt signaling  
409 and *tbx16* form a bistable switch to commit bipotential progenitors to mesoderm.  
410 *Development* **142**: 2499-+.
- 411 Campbell K. 2018. Contribution of epithelial-mesenchymal transitions to organogenesis and  
412 cancer metastasis. *Curr Opin Cell Biol* **55**: 30-35.
- 413 Chapman DL, Papaioannou VE. 1998. Three neural tubes in mouse embryos with mutations in  
414 the T-box gene *Tbx6*. *Nature* **391**: 695-697.
- 415 Cross MA, Enver T. 1997. The lineage commitment of haemopoietic progenitor cells. *Curr Opin*  
416 *Genet Dev* **7**: 609-613.
- 417 Delfino-Machin M, Lunn JS, Breitkreuz DN, Akai J, Storey KG. 2005. Specification and  
418 maintenance of the spinal cord stem zone. *Development* **132**: 4273-4283.
- 419 Fior R, Maxwell AA, Ma TP, Vezzaro A, Moens CB, Amacher SL, Lewis J, Saude L. 2012. The  
420 differentiation and movement of presomitic mesoderm progenitor cells are controlled  
421 by Mesogenin 1. *Development* **139**: 4656-4665.
- 422 Garriock RJ, Chalamalasetty RB, Kennedy MW, Canizales LC, Lewandoski M, Yamaguchi TP.  
423 2015. Lineage tracing of neuromesodermal progenitors reveals novel Wnt-dependent  
424 roles in trunk progenitor cell maintenance and differentiation. *Development* **142**: 1628-  
425 1638.
- 426 Goto H, Kimmey SC, Row RH, Matus DQ, Martin BL. 2017. FGF and canonical Wnt signaling  
427 cooperate to induce paraxial mesoderm from tailbud neuromesodermal progenitors  
428 through regulation of a two-step epithelial to mesenchymal transition. *Development*  
429 **144**: 1412-1424.

- 430 Gou Y, Guo J, Maulding K, Riley BB. 2018a. sox2 and sox3 cooperate to regulate  
431 otic/epibranchial placode induction in zebrafish. *Dev Biol* **435**: 84-95.
- 432 Gou Y, Vemaraju S, Sweet EM, Kwon HJ, Riley BB. 2018b. sox2 and sox3 Play unique roles in  
433 development of hair cells and neurons in the zebrafish inner ear. *Dev Biol* **435**: 73-83.
- 434 Gouti M, Delile J, Stamataki D, Wymeersch FJ, Huang Y, Kleinjung J, Wilson V, Briscoe J. 2017. A  
435 Gene Regulatory Network Balances Neural and Mesoderm Specification during  
436 Vertebrate Trunk Development. *Dev Cell* **41**: 243-261 e247.
- 437 Gouti M, Tsakiridis A, Wymeersch FJ, Huang Y, Kleinjung J, Wilson V, Briscoe J. 2014. In vitro  
438 generation of neuromesodermal progenitors reveals distinct roles for wnt signalling in  
439 the specification of spinal cord and paraxial mesoderm identity. *PLoS Biol* **12**: e1001937.
- 440 Griffin K, Patient R, Holder N. 1995. Analysis of FGF function in normal and no tail zebrafish  
441 embryos reveals separate mechanisms for formation of the trunk and the tail.  
442 *Development* **121**: 2983-2994.
- 443 Griffin KJ, Amacher SL, Kimmel CB, Kimelman D. 1998. Molecular identification of spadetail:  
444 regulation of zebrafish trunk and tail mesoderm formation by T-box genes. *Development*  
445 **125**: 3379-3388.
- 446 Hay ED. 1995. An overview of epithelio-mesenchymal transformation. *Acta Anat (Basel)* **154**: 8-  
447 20.
- 448 Higashijima S, Okamoto H, Ueno N, Hotta Y, Eguchi G. 1997. High-frequency generation of  
449 transgenic zebrafish which reliably express GFP in whole muscles or the whole body by  
450 using promoters of zebrafish origin. *Dev Biol* **192**: 289-299.
- 451 Ho RK, Kane DA. 1990. Cell-autonomous action of zebrafish spt-1 mutation in specific  
452 mesodermal precursors. *Nature* **348**: 728-730.
- 453 Kawakami K, Shima A, Kawakami N. 2000. Identification of a functional transposase of the Tol2  
454 element, an Ac-like element from the Japanese medaka fish, and its transposition in the  
455 zebrafish germ lineage. *Proc Natl Acad Sci U S A* **97**: 11403-11408.
- 456 Kimelman D. 2016. Tales of Tails (and Trunks): Forming the Posterior Body in Vertebrate  
457 Embryos. *Curr Top Dev Biol* **116**: 517-536.
- 458 Kimmel CB, Kane DA, Walker C, Warga RM, Rothman MB. 1989. A mutation that changes cell  
459 movement and cell fate in the zebrafish embryo. *Nature* **337**: 358-362.
- 460 Koch F, Scholze M, Witter L, Schifferl D, Sudheer S, Grote P, Timmermann B, Macura K,  
461 Herrmann BG. 2017. Antagonistic Activities of Sox2 and Brachyury Control the Fate  
462 Choice of Neuro-Mesodermal Progenitors. *Dev Cell* **42**: 514-526 e517.
- 463 Kormish JD, Sinner D, Zorn AM. 2010. Interactions between SOX factors and Wnt/beta-catenin  
464 signaling in development and disease. *Dev Dyn* **239**: 56-68.
- 465 Kwan KM, Fujimoto E, Grabher C, Mangum BD, Hardy ME, Campbell DS, Parant JM, Yost HJ,  
466 Kanki JP, Chien CB. 2007. The Tol2kit: a multisite gateway-based construction kit for Tol2  
467 transposon transgenesis constructs. *Dev Dyn* **236**: 3088-3099.
- 468 Lewis KE, Eisen JS. 2004. Paraxial mesoderm specifies zebrafish primary motoneuron subtype  
469 identity. *Development (Cambridge, England)* **131**: 891-902.
- 470 Li W, Kang Y. 2016. Probing the Fifty Shades of EMT in Metastasis. *Trends Cancer* **2**: 65-67.
- 471 Mallo M. 2019. The vertebrate tail: a gene playground for evolution. *Cell Mol Life Sci*.
- 472 Manning AJ, Kimelman D. 2015. Tbx16 and Msn1 are required to establish directional cell  
473 migration of zebrafish mesodermal progenitors. *Dev Biol*.

- 474 Martin BL. 2016. Factors that coordinate mesoderm specification from neuromesodermal  
475 progenitors with segmentation during vertebrate axial extension. *Semin Cell Dev Biol* **49**:  
476 59-67.
- 477 Martin BL, Kimelman D. 2008. Regulation of canonical Wnt signaling by Brachyury is essential  
478 for posterior mesoderm formation. *Dev Cell* **15**: 121-133.
- 479 Martin BL, Kimelman D. 2009. Wnt signaling and the evolution of embryonic posterior  
480 development. *Curr Biol* **19**: R215-219.
- 481 Martin BL, Kimelman D. 2010. Brachyury establishes the embryonic mesodermal progenitor  
482 niche. *Genes Dev* **24**: 2778-2783.
- 483 Martin BL, Kimelman D. 2012. Canonical Wnt signaling dynamically controls multiple stem cell  
484 fate decisions during vertebrate body formation. *Dev Cell* **22**: 223-232.
- 485 Morrow ZT, Maxwell AM, Hoshijima K, Talbot JC, Grunwald DJ, Amacher SL. 2017. *tbx6l* and  
486 *tbx16* are redundantly required for posterior paraxial mesoderm formation during  
487 zebrafish embryogenesis. *Dev Dyn* **246**: 759-769.
- 488 Nakaya Y, Sheng G. 2013. EMT in developmental morphogenesis. *Cancer Lett.*
- 489 Nieto MA. 2013. Epithelial plasticity: a common theme in embryonic and cancer cells. *Science*  
490 **342**: 1234850.
- 491 Nieto MA, Huang RY, Jackson RA, Thiery JP. 2016. Emt: 2016. *Cell* **166**: 21-45.
- 492 Nimmo RA, May GE, Enver T. 2015. Primed and ready: understanding lineage commitment  
493 through single cell analysis. *Trends Cell Biol* **25**: 459-467.
- 494 Preibisch S, Saalfeld S, Tomancak P. 2009. Globally optimal stitching of tiled 3D microscopic  
495 image acquisitions. *Bioinformatics (Oxford, England)* **25**: 1463-1465.
- 496 Row RH, Maitre JL, Martin BL, Stockinger P, Heisenberg CP, Kimelman D. 2011. Completion of  
497 the epithelial to mesenchymal transition in zebrafish mesoderm requires Spadetail.  
498 *Developmental Biology* **354**: 102-110.
- 499 Row RH, Tsotras SR, Goto H, Martin BL. 2016. The zebrafish tailbud contains two independent  
500 populations of midline progenitor cells that maintain long-term germ layer plasticity and  
501 differentiate in response to local signaling cues. *Development* **143**: 244-254.
- 502 Shin J, Chen J, Solnica-Krezel L. 2014. Efficient homologous recombination-mediated genome  
503 engineering in zebrafish using TALE nucleases. *Development* **141**: 3807-3818.
- 504 Steventon B, Duarte F, Lagadec R, Mazan S, Nicolas JF, Hirsinger E. 2016. Species-specific  
505 contribution of volumetric growth and tissue convergence to posterior body elongation  
506 in vertebrates. *Development* **143**: 1732-1741.
- 507 Takada S, Stark KL, Shea MJ, Vassileva G, McMahon JA, McMahon AP. 1994. Wnt-3a regulates  
508 somite and tailbud formation in the mouse embryo. *Genes & Development* **8**: 174-189.
- 509 Takemoto T, Uchikawa M, Yoshida M, Bell DM, Lovell-Badge R, Papaioannou VE, Kondoh H.  
510 2011. *Tbx6*-dependent *Sox2* regulation determines neural or mesodermal fate in axial  
511 stem cells. *Nature* **470**: 394-398.
- 512 Tzouanacou E, Wegener A, Wymeersch FJ, Wilson V, Nicolas J-F. 2009. Redefining the  
513 Progression of Lineage Segregations during Mammalian Embryogenesis by Clonal  
514 Analysis. *Developmental cell* **17**: 365-376.
- 515 Wymeersch FJ, Huang Y, Blin G, Cambray N, Wilkie R, Wong FC, Wilson V. 2016. Position-  
516 dependent plasticity of distinct progenitor types in the primitive streak. *Elife* **5**: e10042.

- 517 Yabe T, Takada S. 2012. Mesogenin causes embryonic mesoderm progenitors to differentiate  
518 during development of zebrafish tail somites. *Dev Biol* **370**: 213-222.
- 519 Ye X, Weinberg RA. 2015. Epithelial-Mesenchymal Plasticity: A Central Regulator of Cancer  
520 Progression. *Trends Cell Biol* **25**: 675-686.
- 521 Ye X, Wu F, Wu C, Wang P, Jung K, Gopal K, Ma Y, Li L, Lai R. 2014. beta-Catenin, a Sox2 binding  
522 partner, regulates the DNA binding and transcriptional activity of Sox2 in breast cancer  
523 cells. *Cell Signal* **26**: 492-501.
- 524
- 525
- 526
- 527
- 528
- 529
- 530
- 531
- 532

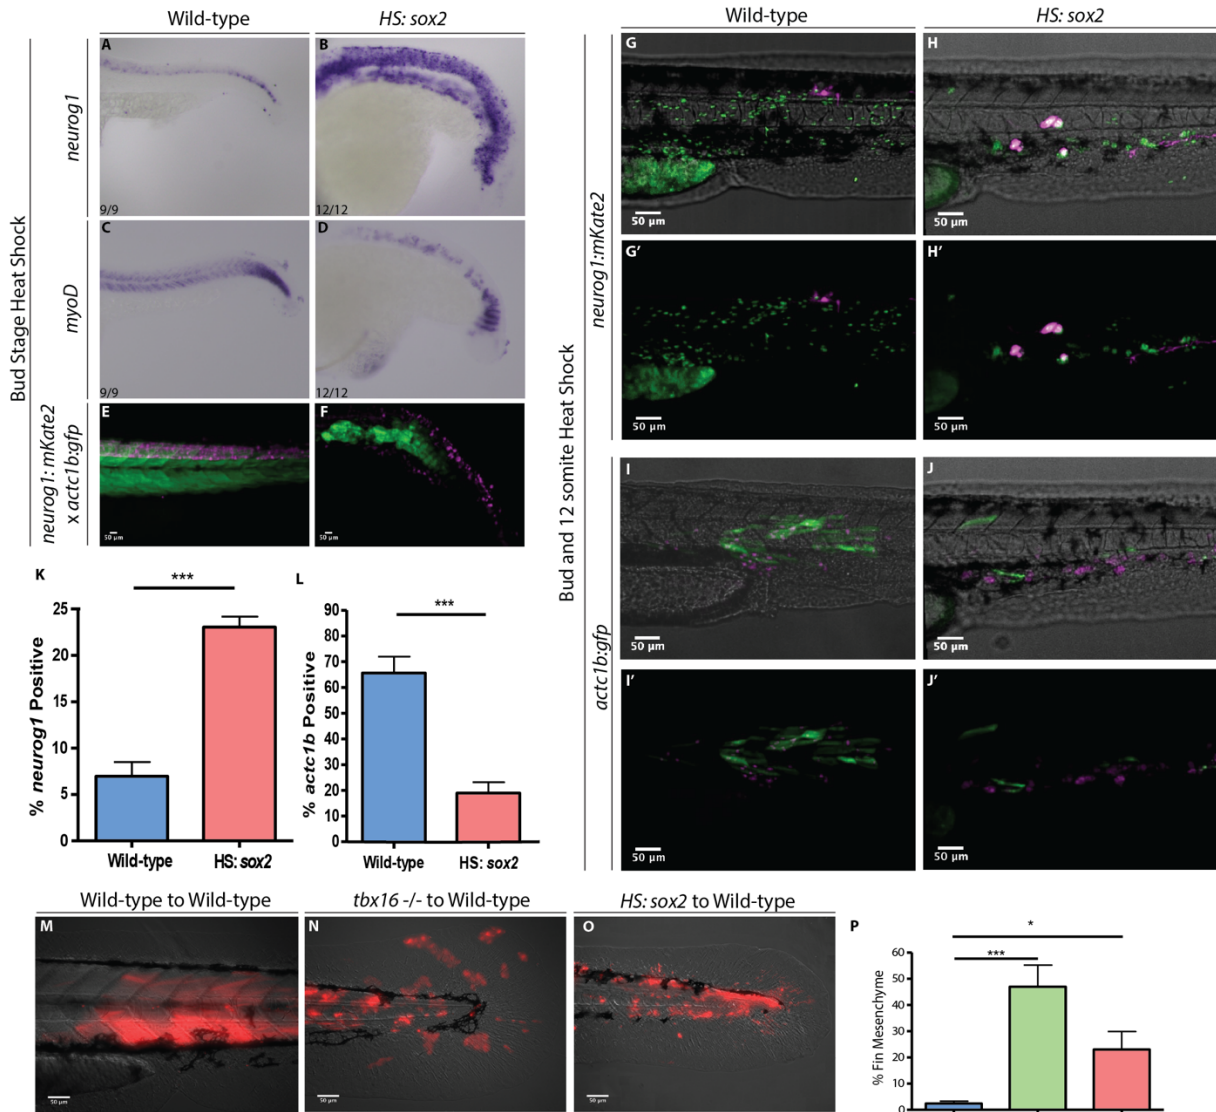

Figure 1 Kinney et al.

533  
 534 **Figure 1. *sox2* activation causes an increase of neural progenitors and a decrease in presomitic**  
 535 **mesoderm.** Whole-mount in situ hybridization visualizing *neurog1* (neural) (A, B) or *myoD* (skeletal  
 536 muscle) (C, D) in wild-type (A, C) and *HS:sox2* embryos (B, D). All embryos for *in situ* hybridization were  
 537 heat shocked at bud stage at 40°C for 30 minutes and fixed at 24 hpf. Transgenic embryos with the  
 538 *ngn:mKate* and *actc1b:gfp* reporters show a similar neural expansion and muscle loss in *HS:sox2* (F)  
 539 embryos compared to wild-type (E). Live-imaged transgenic embryos were heat-shocked at bud stage at  
 540 40°C for 30 minutes and imaged at 36 hpf. Embryos with the *neurog1:mKate* (G-H') or the *actc1b:gfp* (I-J')  
 541 reporter were injected with *NLS-KikGR* mRNA and transplanted into the ventral margin of wild-type host  
 542 embryos. Donor cells with the *HS:sox2* transgene exhibited an increase in the percentage *neurog1:mKate*  
 543 positive cells (H, H' compared to G, G' and quantified in K, 1,177 wild-type donor cells were counted in 8  
 544 host embryos, and 2,051 *HS:sox2* donor cells were counted from 10 host embryos, statistics were  
 545 performed using an unpaired t test,  $P=0.0105$ ) and a decrease in the percentage of *actc1b:gfp* positive  
 546 cells (J, J' compared to I, I' and quantified in L, 1,307 wild-type donor cells were counted in 8 host embryos,  
 547 and 971 *HS:sox2* donor cells were counted from 5 host embryos, statistics were performed using an  
 548 unpaired t test  $***P=0.0003$ ). The *NLS-KikGR* protein was photoconverted to red fluorescence in I-J'. Wild-  
 549 type, *tbx16* mutant, and *HS:sox2* embryos were injected with rhodamine dextran and transplanted into

550 the ventral margin of shield stage wild-type host embryos (M-O). The percent of transplanted cell  
551 contribution to fin mesenchyme is quantified in panel P (2,129 wild-type donor cells were counted in 6  
552 host embryos, 2,714 *tbx6* *-/-* donor cells were counted in 6 host embryos (\*\**P*=0.0006), and 2,347  
553 *HS:sox2* donor cells were counted from 9 host embryos (\**P*=0.0322)). All transplants were heat shocked  
554 at bud stage and 12-somites at 39°C for 30 minutes.  
555

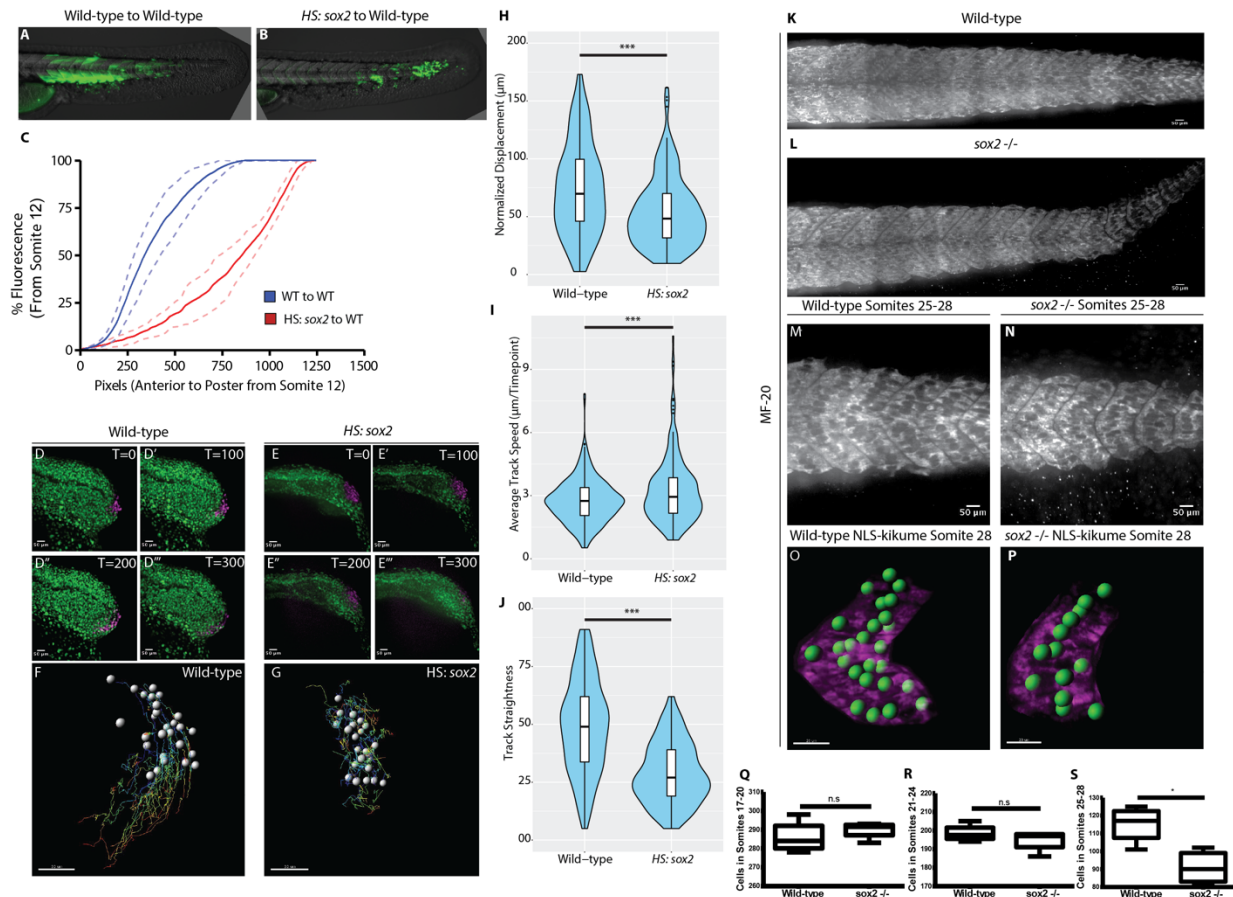

Figure 2 Kinney et al.

556  
 557 **Figure 2. *sox2* levels control the rate of NMP exit into the mesoderm.** Wild-type and *HS:sox2* embryos  
 558 were injected with fluorescein dextran and cells from these embryos were transplanted into the ventral  
 559 margin of shield stage wild-type host embryos (A, B, respectively). Transplants were heat shocked at bud  
 560 stage and 12-somites at 39°C for 30 minutes and imaged at 36 hpf. Quantification of tailbud exit was  
 561 measured as a line-scan of compound fluorescence from anterior to posterior, comparing wild-type  
 562 transplanted cells (blue, N=10) with *HS:sox2* transplanted cells (red, N=6) (C). Dotted lines indicate 90%  
 563 confidence. Wild-type (D-D''') or *HS:sox2* (E-E''') embryos with ubiquitous NLS-KikGR expression were  
 564 photoconverted in the NMP region and time-lapse imaged for 300 minutes. Migratory tracks of  
 565 photoconverted wild-type and *HS:sox2* nuclei were quantified (F, 281 cells were tracked in 5 embryos, G,  
 566 200 cells were tracked in 3 embryos, \*\*\*P<0.0001), revealing that displacement (H) and track straightness  
 567 (J) were reduced in *HS:sox2* embryos, whereas average track speed was increased (I). See also Fig. S1 for  
 568 analysis of cell shape in *HS:sox2* embryos. MF-20 antibody labeling of wild-type (K, M) and *sox2*  
 569 homozygous mutant (L, N) embryos showed that posterior somites are smaller in *sox2* mutants. Somitic  
 570 nuclei were quantified, revealing that posterior somites in *sox2* mutants have significantly fewer cells than  
 571 wild-type somites (O-S, Q P=0.4721, R P=0.3208, S \*P=0.0145).

572  
 573  
 574  
 575  
 576



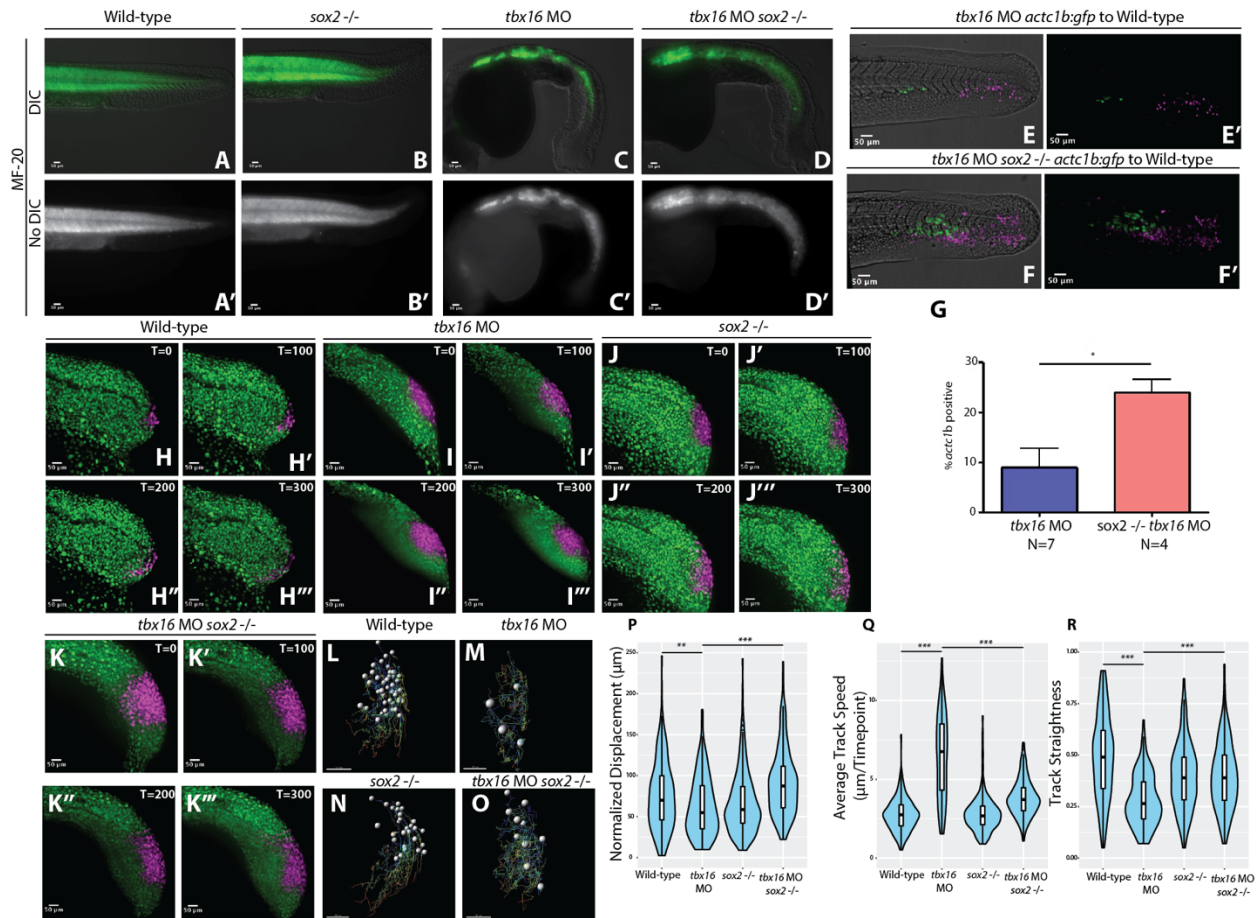

Figure 3 Kinney et al.

577  
 578 **Figure 3. Loss of *sox2* function rescues *tbx16* loss of function.** MF-20 labeling of wild-type, *sox2*<sup>-/-</sup>, *tbx16*  
 579 morphant, and dual *sox2*<sup>-/-</sup> *tbx16* morphant embryos shows an increase in skeletal muscle in *tbx16*  
 580 morphant embryos when *sox2* function is eliminated (A-D', D, D' compared to C, C'). Transplant  
 581 experiments were performed by injecting rhodamine dextran and *tbx16* MOs into embryos from a  
 582 *actc1b:gfp sox2*<sup>+/-</sup> in cross and transplanting cells into the ventral margin of wild-type host embryos.  
 583 Donor cells with *sox2* function and *tbx16* loss of function showed a significantly smaller percentage of the  
 584 total number of transplanted cells contributing to muscle compared to donor cells without *sox2* or *tbx16*  
 585 function (E-G, 1,030 *tbx16* morphant donor cells were counted from 7 host embryos, and 609 *sox2*<sup>-/-</sup>  
 586 *tbx16* morphant donor cells were counted from 4 host embryos, \*P=0.0082). Statistics were performed  
 587 using an unpaired T-test. N indicates number of host embryos. Wild-type (H-H'''), *tbx16* morphant (I-I'''),  
 588 *sox2*<sup>-/-</sup> (J-J'''), or *sox2*<sup>-/-</sup> and *tbx16* morphant (K-K''') embryos with ubiquitous NLS-KikGR expression  
 589 were photoconverted in the NMP region and time-lapse imaged for 300 minutes. Migratory tracks of  
 590 photoconverted nuclei were quantified (L-O, 281 wild-type cells were tracked from 5 embryos, 183 *tbx16*  
 591 morphant cells were tracked from 3 embryos, 210 *sox2*<sup>-/-</sup> cells were tracked from 3 embryos, and 218  
 592 *sox2*<sup>-/-</sup> *tbx16* morphant cells were tracked from 3 embryos, \*\*P=0.0029, \*\*\*P<0.0001), revealing that  
 593 displacement (P), track speed (Q), and track straightness (R) were all significantly rescued towards wild-  
 594 type levels in dual *sox2* and *tbx16* loss of function embryos compared to *tbx16* morphants alone.

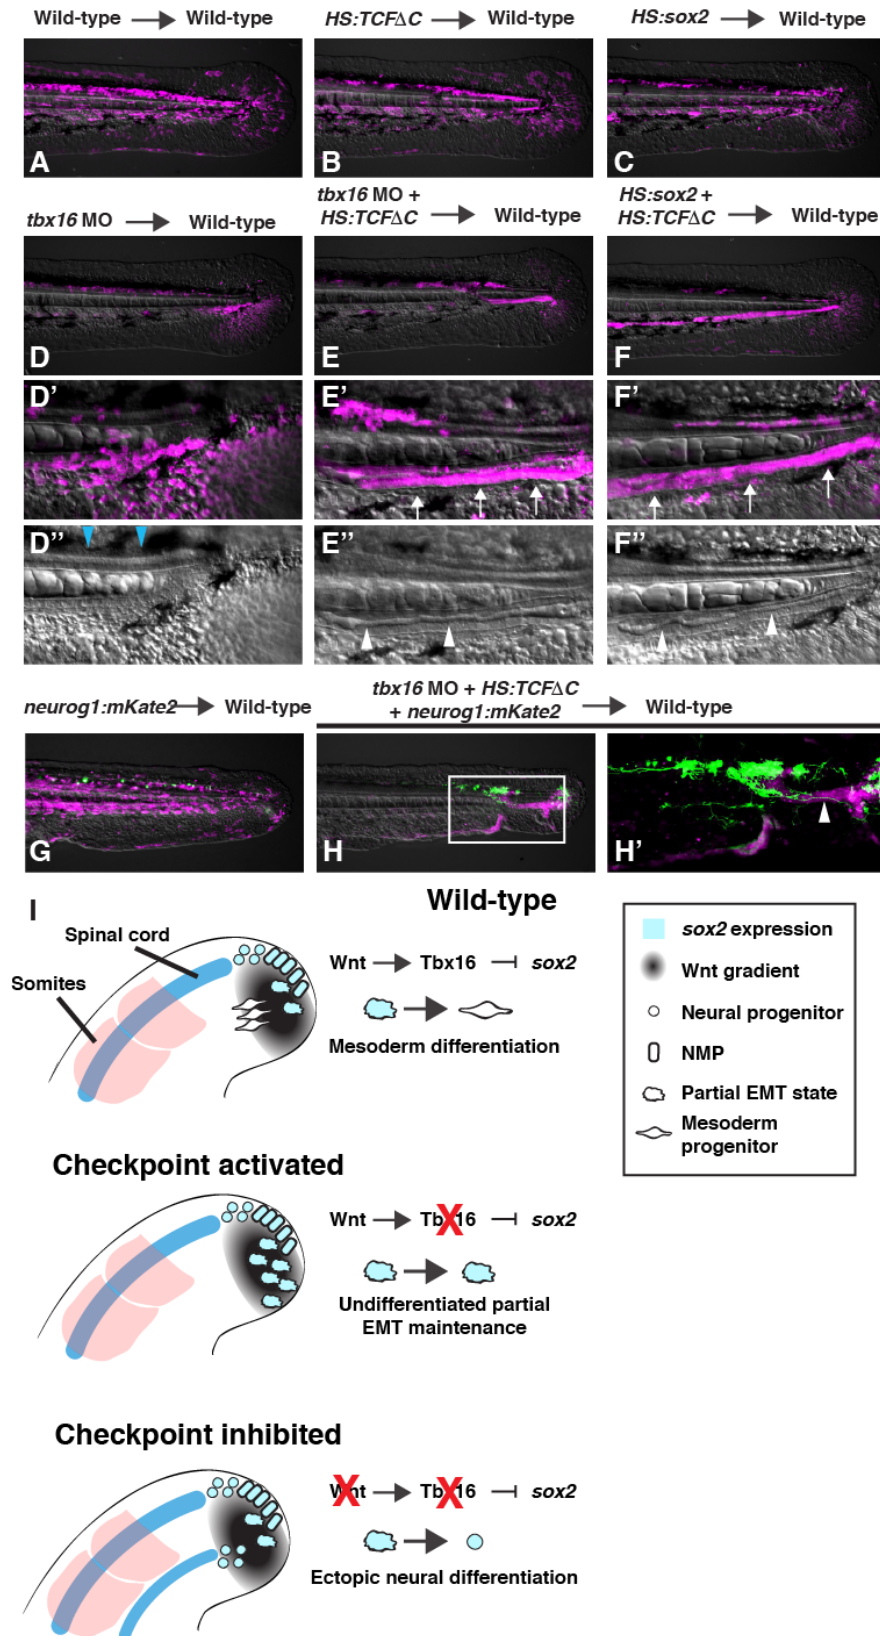

596 **Figure 4. *sox2* activation in the absence of Wnt signaling results in ectopic spinal cords in transplanted**  
597 **cells.** (A) Wild-type to wild-type transplant (N=16). (B) *HS:TCFΔC* to wild-type transplant (N=18). (C)  
598 *HS:sox2* to wild-type transplant (N=4). (D-D'') *tbx16* mo to wild-type transplant (N=35). (E-E'') *HS:TCFΔC*  
599 *tbx16* MO to wild-type transplant (N=43). (F-F'') *HS: sox2* x *HS:TCFΔC* transplant (N=17). All transplants  
600 were performed by injecting donor embryos with 2% fluorescein dextran (false colored magenta) and  
601 transferring donor cells to the margin of 30% epiboly wild-type host embryos. All transplants were heat  
602 shocked at 40°C for 30 minutes. Loss of *tbx16* function causes donor cells that would normally form  
603 paraxial mesoderm to become fin mesenchyme (D', blue arrowheads indicate the spinal cord, see also  
604 supplemental movie 1). Donor *tbx16* morphant cells in which Wnt signaling has been inhibited can exit  
605 the tailbud into the paraxial mesoderm territory (E', arrows), where they form an ectopic spinal cord with  
606 a neural canal (E'', arrowheads, see also supplemental movie 2). The same phenomenon occurs when  
607 *sox2* is activated and Wnt signaling is inhibited, where transplanted cells leave the tailbud to form an  
608 ectopic spinal cord (F', arrows) with a neural canal (F'', arrowheads, see also supplemental movie 3).  
609 Ectopic spinal cords formed from the combined loss of *tbx16* function and Wnt signaling have  
610 differentiated neurons (green) that form long axonal projections as revealed by the *neurog1:mKate2*  
611 transgene (H, H', arrowhead, compared to control G). See also Fig. S2 for analysis of *neurog1:mKate2* in  
612 whole embryos with loss of Wnt signaling and gain of Sox2 function. A model shows the normal  
613 progression of events as NMPs transition to paraxial mesoderm, as well as the conditions causing  
614 activation of the checkpoint (*tbx16* loss of function) or checkpoint inhibited in which ectopic spinal cords  
615 form (I).

616  
617  
618  
619  
620  
621  
622  
623  
624  
625  
626  
627  
628  
629  
630  
631  
632  
633  
634  
635  
636  
637  
638  
639  
640

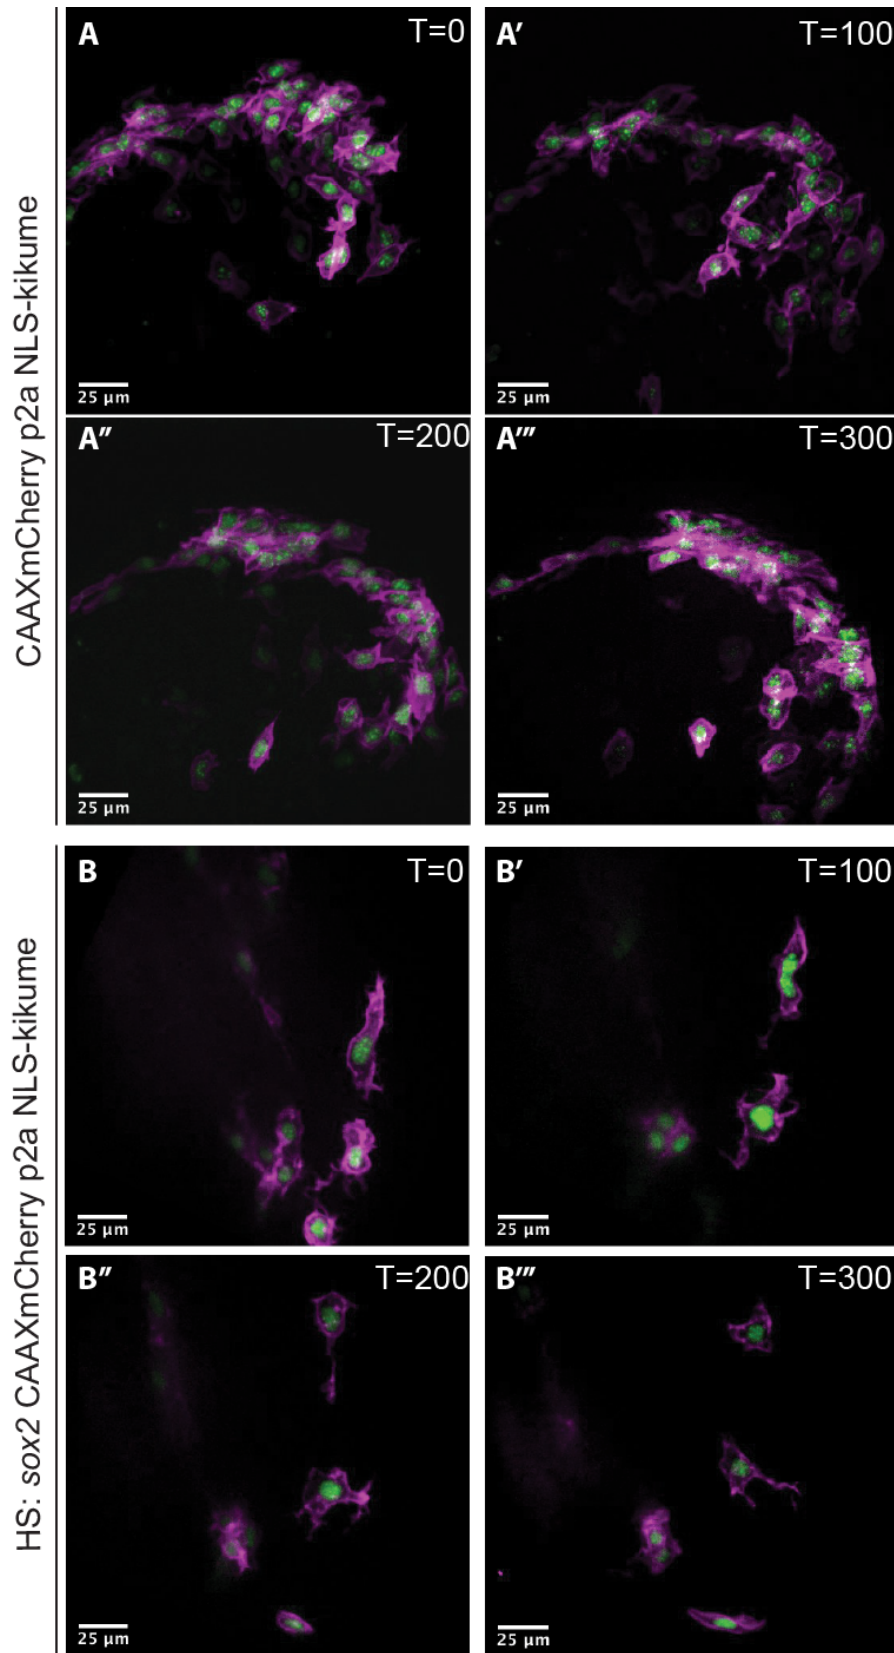

642 **Figure S1 (related to Figure 2): Sox2 gain of function does not prevent the first EMT step of NMPs**  
643 **during mesoderm induction.** Donor cells from *HS:CAAX-mCherry-2A-NLS-KikGR* (A-A''') or *HS:CAAX-*  
644 *mCherry-2A-NLS-KikGR + HS:sox2* (B-B''') embryos were transplanted into the ventral margin of shield  
645 stage wild-type host embryos and heat-shocked at bud stage and 12-somites at 39°C for 30 minutes.  
646 Transplanted cells in which Wnt signaling is inhibited fail to undergo the first step of EMT and remain in  
647 the posterior wall NMP epithelium. Cells with *sox2* gain of function on the other hand are able to  
648 complete the first EMT step as indicated by their protrusive activity but do not complete the second  
649 EMT step (B-B''').

650  
651  
652  
653  
654  
655  
656  
657  
658  
659  
660  
661  
662  
663  
664  
665  
666  
667  
668  
669  
670  
671  
672  
673  
674  
675  
676  
677  
678  
679  
680  
681  
682  
683  
684  
685

686

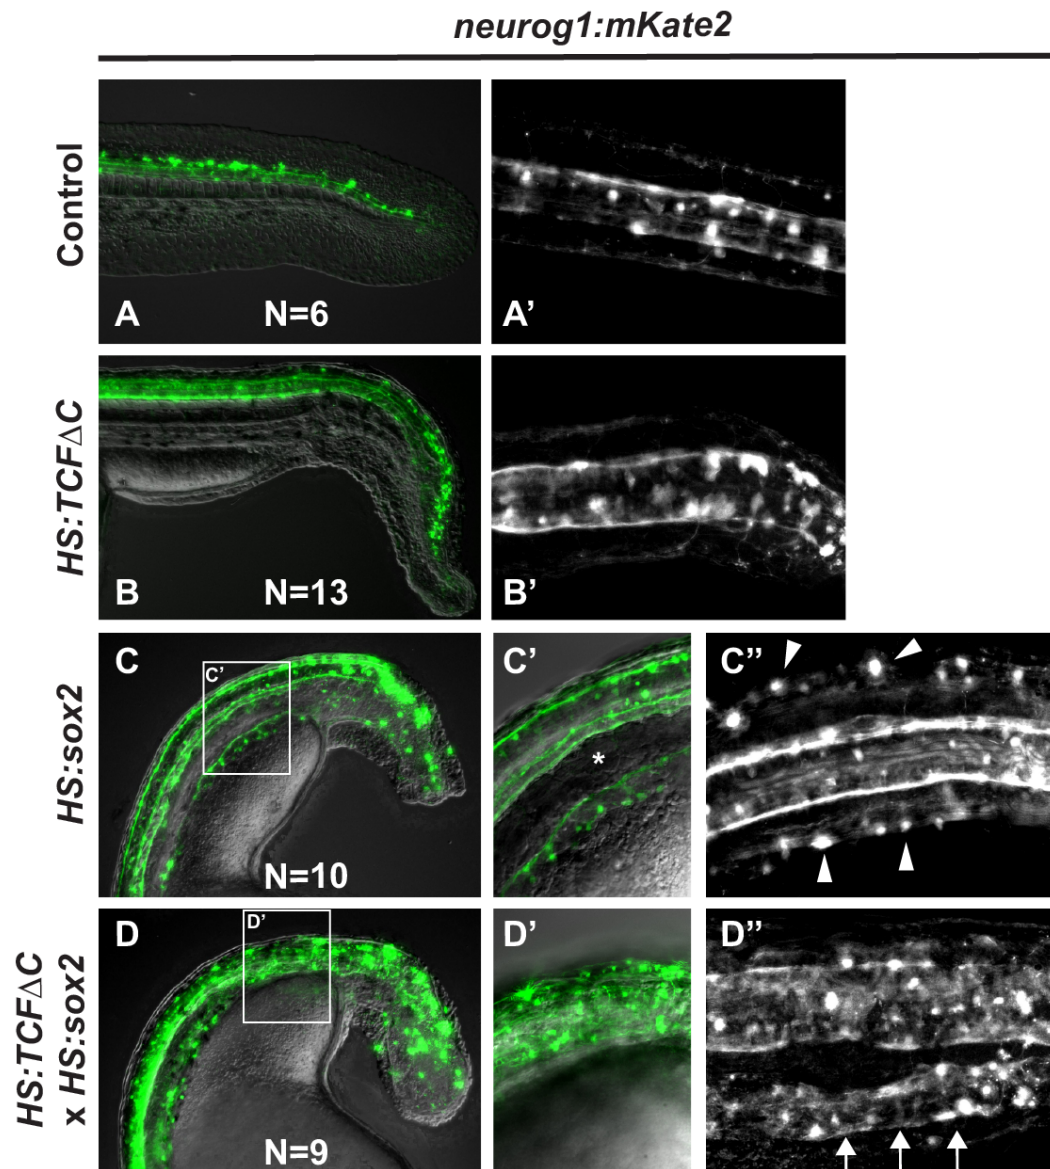

Figure S2 Kinney et al.

687  
688  
689  
690  
691  
692  
693  
694  
695  
696  
697  
698  
699

**Figure S2 (related to Figure 4). Synergy between gain of *sox2* function and loss of Wnt function during NMP transition to mesoderm.** The *neurog1:mKate2* reporter line to monitor neural fate in wild-type (A, A'), Wnt loss of function (B, B'), *sox2* gain of function (C-C''), or combined *sox2* gain of function and Wnt loss of function (D-D''). Embryos were heat-shocked at bud stage and imaged at 48 hpf from a lateral view (A, B, C, C', D, D') or a dorsal view (A', B', C'', D'') with anterior to the left. Control (A, A') and Wnt loss of function (B, B') embryos never show ectopic neural tissue. *Sox2* gain of function embryos have ectopic neurons in the ventral paraxial region, which are separated from the spinal cord by small somites (C', star). The neuron cell bodies are present in lateral positions to the spinal cord (C'', arrowheads). The combined loss of Wnt function and gain of *sox2* function causes a robust expansion of spinal cord fate in the paraxial mesoderm territory (D' compared to C'), which when visualized from a dorsal view shows the existence of an ectopic spinal cord in the paraxial mesoderm territory (D'', arrows).

700 **Supplemental movie 1 (related to Figure 4)- DIC movie of a wild-type host embryo with *tbx16***  
701 **MO donor cells (the same embryo pictured in Figure 4D-D'').** Motile cilia can be observed  
702 beating in the neural canal of the spinal cord (spinal cord is indicated by blue arrowheads in  
703 Figure 4D'').

704  
705 **Supplemental movie 2 (related to Figure 4)- DIC movie of a wild-type host embryo with *tbx16***  
706 **MO + *HS:TCFΔC* donor cells (the same embryo pictured in Figure 4E-E'').** Motile cilia can be  
707 observed beating in the neural canal of the ectopic spinal cord generated by transplanted cells  
708 (ectopic spinal cord is indicated by white arrowheads in Figure 4E'').

709  
710 **Supplemental movie 3 (related to Figure 4)- DIC movie of a wild-type host embryo with**  
711 ***HS:sox2* + *HS:TCFΔC* donor cells (the same embryo pictured in Figure 4F-F'').** Motile cilia can be  
712 observed beating in the neural canal of the ectopic spinal cord generated by transplanted cells  
713 (ectopic spinal cord is indicated by white arrowheads in Figure 4F'').

714  
715
